# Supplementary material for: High contribution of anthropogenic combustion sources to atmospheric inorganic reactive nitrogen in South China evidenced by isotopes
Source: Copernicus journal article supplement (doi:10.5194/acp-23-6395-2023), 2023-06-12
Supplement: Supplementary file 1 [file acp-23-6395-2023-supplement.pdf]

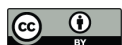

*Supplement of*

## **High contribution of anthropogenic combustion sources to atmospheric inorganic reactive nitrogen in South China evidenced by isotopes**

**Tingting Li et al.**

*Correspondence to:* Jun Li ([junli@gig.ac.cn](mailto:junli@gig.ac.cn))

The copyright of individual parts of the supplement might differ from the article licence.

## Text S1 Chemical components analysis

OC/EC: OC and EC contents were analyzed by thermal-optical carbon analyzer (Sunset Laboratory Inc). One punch of 1.5 cm<sup>2</sup> filter samples was cut and put into the instrument. Blank samples were measured by the same methods. Quality control standards (sucrose solutions) were dropped onto quartz membranes to dry and then the carbon content was tested in the same way to ensure that the instrument was stable before measurement and in the testing process.

Water-soluble ions: Na<sup>+</sup>, K<sup>+</sup>, Mg<sup>2+</sup>, Ca<sup>2+</sup>, NH<sub>4</sub><sup>+</sup>, Cl<sup>-</sup>, SO<sub>4</sub><sup>2-</sup>, and NO<sub>3</sub><sup>-</sup> were measured by ion chromatography. The blank samples were also analyzed following the same procedure for samples. Reagent blanks (ultrapure water) and quality control standards were measured every 10 samples to detect contamination and drift.

Isotopic analysis: The δ<sup>15</sup>N-NO<sub>3</sub><sup>-</sup> and δ<sup>18</sup>O-NO<sub>3</sub><sup>-</sup> values (‰) were corrected by multi-point correction (r<sup>2</sup>=0.999) based on international standards (IAEA-NO<sub>3</sub>, USGS32, USGS34, and USGS35) and δ<sup>15</sup>N-NH<sub>4</sub><sup>+</sup> was corrected by international standards (IAEA-N1, USGS25, and USGS26) (Sun et al., 2021; Zong et al., 2017).

Radioactive isotope analysis: <sup>210</sup>Pb and <sup>7</sup>Be were analyzed at Shenzhen University using high-purity γ spectrometer equipped with an HPGe detector (Jiang et al., 2021; Liu et al., 2020). <sup>210</sup>Pb in the atmosphere mainly comes from terrestrial sources and is effective indicator of the aerosols transport from the continental surface. The *f*(<sup>7</sup>Be, <sup>210</sup>Pb) index is powerful to reveal the influence of atmospheric dynamic transport on variations in aerosol pollutants, and expressed as following equation (Jiang et al., 2021). Generally, the relatively high values of *f*(<sup>7</sup>Be, <sup>210</sup>Pb) index represented that the aerosol pollutants were influenced by long-range transport from the upper air.

$$f(^7Be, ^{210}Pb) = \frac{[^7Be]}{[^7Be] + n[^{210}Pb]} \quad (S1)$$

where [<sup>7</sup>Be] and [<sup>210</sup>Pb] are activity concentrations of <sup>7</sup>Be and <sup>210</sup>Pb, respectively, n is estimated as the ratio of the standard deviation of [<sup>7</sup>Be] to [<sup>210</sup>Pb].

Trace gas: concentrations of trace gases (NO, NO<sub>2</sub>, SO<sub>2</sub>, O<sub>3</sub>, and CO) were acquired from online equipment. The online equipment included a gas filter analyzer (Thermo Scientific, Model 48i) to measure CO, a pulse fluorescence analyzer (Thermo

Scientific, Model 43iTLE) to measure SO<sub>2</sub> and O<sub>3</sub>, and a chemiluminescence apparatus (Thermo Scientific, Model 42iTL) to measure NO and NO<sub>2</sub>.

Meteorological parameters: Temperature, relative humidity, wind speed, and atmospheric pressure were also acquired by a portable weather analyzer (WXT520, Vaisala, Finland). Trace gas concentrations and meteorological parameters were hourly data. In this study, average data of 24 hours through a sampling period were used.

## **Text S2 Sources of atmospheric NH<sub>3</sub> and NO<sub>x</sub> in Guangzhou, NO<sub>3</sub><sup>-</sup> formation pathways in Guangzhou**

**Atmospheric NH<sub>3</sub> sources.** There are two major groups of atmospheric NH<sub>3</sub> emission sources(Chen et al., 2022b). One is NH<sub>3</sub> volatilization from NH<sub>4</sub><sup>+</sup>-containing substrates (mainly fertilized and natural soils, livestock, human wastes, and natural and N-polluted water). Although Guangzhou is an urban site, the emission inventory results showed a high contribution of nitrogen fertilizers application and livestock to atmospheric NH<sub>3</sub> (Zheng et al., 2012), which may be influenced by agricultural activities around Guangzhou. Human waste is also an important contributor to NH<sub>3</sub> in cities, as suggested by a study in Shanghai(Chang et al., 2015). Guangzhou is one of China's megacities with a dense population, so the contribution of human waste to atmospheric NH<sub>3</sub> in Guangzhou cannot be ignored. Therefore, nitrogen fertilizers application, livestock, and human waste were considered as sources of volatilization NH<sub>3</sub> in this study. In addition, the other group is NH<sub>3</sub> associated with combustion sources (such as coal burning, vehicles, and biomass burning). The contribution of biomass burning and coal combustion to NH<sub>3</sub> was very high (about 76.3%) in developing countries, as suggested by the global high-resolution emissions inventory (Meng et al., 2017). NH<sub>3</sub> in Chinese cities was indeed influenced by coal and biomass combustion evidenced by isotopes(Xiao et al., 2020; Liu et al., 2018; Pan et al., 2018). Selective catalytic reduction technology equipped with vehicles and industrial boiler is also an important source of NH<sub>3</sub>(Meng et al., 2017). With the rapid increase in vehicle ownership, vehicle emission has a significant impact on urban NH<sub>3</sub>, which was confirmed by tunnel tests in Guangzhou (Liu et al., 2014). Therefore, biomass burning,

coal combustion, and vehicles were considered as sources of combustion  $\text{NH}_3$  in this study.

**Atmospheric NO<sub>x</sub> sources.** We considered coal combustion, mobile traffic sources, biomass burning, and soil microbial activity as dominant atmospheric NO<sub>x</sub> sources. Based on bottom-up emission inventory, power plant, industry, residential use, and transportation were the traditional NO<sub>x</sub> emission sources in cities in China, including Guangzhou (Liu et al., 2017a). According to the type of fuel combustion, traditional sources of NO<sub>x</sub> could be roughly divided into coal combustion (power plant, industry, and residential use) and mobile sources (transportation including vehicle exhaust and ship emission). Furthermore, recent studies show that biomass burning is an essential source of NO<sub>x</sub> based on emission factor study (Mehmood et al., 2017) and isotopic evidence (Zong et al., 2020). Microbial process emission is another important source of NO<sub>x</sub>, in which nitrification or denitrification microbial bacteria widely distributed in soils consume accumulated nitrogen and release NO as a byproduct (Hall and Matson, 1996; Jaeglé et al., 2004). The cultivated land with extensive use of nitrogen fertilizer in the suburbs around Guangzhou is also an important source of NO<sub>x</sub>, which is named as microbial process in this study.  $\delta^{15}\text{N}$ -NO<sub>x</sub> values differed significantly among these four sources, which allows us to differentiate their relative contributions to the mixture of atmospheric. We did not consider  $\text{NO}_3^-$  from lightning because it accounts for less than 5% of global terrestrial NO<sub>x</sub> emissions (Song et al., 2021; Qu et al., 2020; Pickering et al., 2016).

**NO<sub>3</sub><sup>-</sup> formation pathways.** There are several major formation pathways of  $\text{NO}_3^-$ .

P1 ( $\text{NO}_2 + \cdot\text{OH}$ ),  $\text{NO}_2$  is oxidized by  $\cdot\text{OH}$  to form  $\text{HNO}_3$ , then reacts with alkaline substances (such as  $\text{NH}_3$ ) to form  $\text{NO}_3^-$ .

P2 ( $\text{N}_2\text{O}_5$ ),  $\text{NO}_2$  is oxidized by  $\text{O}_3$  to form  $\cdot\text{NO}_3$ ,  $\cdot\text{NO}_3$  reacts with  $\text{NO}_2$  to form  $\text{N}_2\text{O}_5$ , then the hydrolysis of  $\text{N}_2\text{O}_5$  on aerosol surfaces produces  $\text{NO}_3^-$ .

P3 ( $\cdot\text{NO}_3 + \text{org}$ ), the  $\text{NO}_2$  is oxidized by  $\text{O}_3$  to form  $\cdot\text{NO}_3$ , then the  $\cdot\text{NO}_3$  reacts with organic, such as dimethyl sulfide (DMS) or hydrocarbons (HC) to form  $\text{HNO}_3$ , and then  $\text{NO}_3^-$ .

P4 ( $\cdot\text{NO}_3 + \cdot\text{HO}_2$ ),  $\text{NO}_2$  is oxidized by  $\text{O}_3$  to form  $\cdot\text{NO}_3$ ,  $\cdot\text{NO}_3$  reacts with  $\cdot\text{HO}_2$  to

form  $\text{HNO}_3$ .

The P1 ( $\cdot\text{OH}$ ) and P2 ( $\text{N}_2\text{O}_5$ ) pathways are dominant formation pathways. Song reported that  $\cdot\text{OH}$  and  $\text{N}_2\text{O}_5$  pathways contributed 43% and 32% to  $\text{NO}_3^-$ , respectively, by isotope tracing (Song et al., 2021). Based on isotopic estimates, the contribution of  $\cdot\text{NO}_3+\text{org}$  to  $\text{NO}_3^-$  was relatively high, e.g., about 16% in Beijing (Song et al., 2021). However, the proportion of  $\cdot\text{NO}_3+\text{org}$  estimated by the Community Multiscale Air Quality (CAMQ) model was very low in the YRD (Sun et al., 2022) and PRD (Qu et al., 2021), especially in Guangzhou (central PRD) where it is only 4% (Qu et al., 2021). The  $\cdot\text{OH}$  and  $\text{N}_2\text{O}_5$  were the dominant pathways and contributed 94% to  $\text{NO}_3^-$  in Guangzhou (Qu et al., 2021). We speculate that the different contribution of  $\cdot\text{NO}_3+\text{org}$  pathway between Guangzhou and Beijing may be caused by the difference in atmospheric oxidation. The ozone pollution is serious in Guangzhou due to a unique synoptic system including the surface high-pressure system, hurricane movement, and sea-land breeze (Tan et al., 2019). And the atmospheric  $\cdot\text{OH}$  reactivity in Guangzhou was higher than in several cities, including Beijing (Tan et al., 2019). Take DMS as an example, the main oxidant of DMS is  $\cdot\text{OH}$  (Andreae and Crutzen, 1997). However, in the cold season or remote regions, the  $\cdot\text{NO}_3$  radical can also play an important role in reaction with DMS (addition reaction and hydrogen abstraction) (Andreae and Crutzen, 1997; Yin et al., 1990). The high reactivity of  $\cdot\text{OH}$  may reduce the contribution of  $\cdot\text{NO}_3$  to DMS in Guangzhou due to the competition between  $\cdot\text{OH}$  and  $\cdot\text{NO}_3$  to react with DMS. Therefore, the contribution of  $\cdot\text{NO}_3+\text{org}$  to  $\text{NO}_3^-$  was relatively low. In addition, the  $\delta^{18}\text{O}$  of  $\text{NO}_3^-$  formed by the  $\text{N}_2\text{O}_5$  and  $\cdot\text{NO}_3+\text{org}$  pathway is similar (Walters and Michalski, 2016). The introduction of the  $\cdot\text{NO}_3+\text{org}$  pathway would greatly increase the uncertainty of the contribution of  $\text{N}_2\text{O}_5$  pathways. While the  $\delta^{18}\text{O}$  of  $\text{NO}_3^-$  formed by the  $\cdot\text{OH}$  and  $\text{N}_2\text{O}_5$  pathway differ significantly, which allows to differentiate their relative contributions to  $\text{NO}_3^-$ . Therefore, we considered only the  $\cdot\text{OH}$  and  $\text{N}_2\text{O}_5$  pathways in this study.

Specifically, the  $\cdot\text{OH}$  and  $\text{N}_2\text{O}_5$  pathways are expressed by R1-R8. Once emitted into the atmosphere,  $\text{NO}_x$  is oxidized to  $\text{HNO}_3$  or  $\text{NO}_3^-$  via the following chemical pathways (R1-R8) (Fang et al., 2011). In summary,  $\text{NO}_x$  oxygen atoms are rapidly

exchanged with O<sub>3</sub> in the NO/NO<sub>2</sub> cycle (R1-R3); ·OH radicals result in the oxidation of NO<sub>2</sub> to HNO<sub>3</sub> (R4; the ·OH pathway); NO<sub>2</sub> is oxidized by O<sub>3</sub> to produce ·NO<sub>3</sub> (R5), which subsequently combines with NO<sub>2</sub> to form N<sub>2</sub>O<sub>5</sub> (R6), and then undergoes hydrolysis to form HNO<sub>3</sub> (R7), referred to as the O<sub>3</sub> pathway; and the generated HNO<sub>3</sub> combines with alkali to form NO<sub>3</sub><sup>-</sup> (R8). Overall, the ·OH and O<sub>3</sub> pathways are the two fundamental oxidation pathways for NO<sub>x</sub>, generally exhibiting noticeable diurnal and seasonal variation (Elliott et al., 2007). Previous research has found that the ·OH pathway is more prevalent during the daytime and in summer when the relative concentration of ·OH is higher. Conversely, the O<sub>3</sub> pathway is more dominant overnight and in winter, because N<sub>2</sub>O<sub>5</sub> is thermally unstable (Hastings et al., 2003; Xiao et al., 2015). The O<sub>3</sub> in the troposphere has a higher δ<sup>18</sup>O value, while δ<sup>18</sup>O-OH and δ<sup>18</sup>O-H<sub>2</sub>O is lower. The δ<sup>18</sup>O-HNO<sub>3</sub> formed by the ·OH pathway is contributed by 2/3 O<sub>3</sub> and 1/3 ·OH (R4), while in the N<sub>2</sub>O<sub>5</sub> hydrolysis pathway after oxidation by O<sub>3</sub>, the δ<sup>18</sup>O-HNO<sub>3</sub> is contributed by 5/6 O<sub>3</sub> and 1/6 H<sub>2</sub>O (R5-R7). Therefore, the δ<sup>18</sup>O-NO<sub>3</sub><sup>-</sup> formed through the ·OH pathway is lower than the N<sub>2</sub>O<sub>5</sub> pathway.

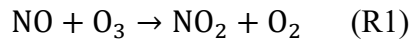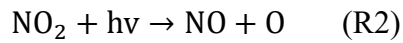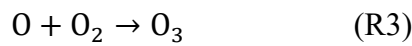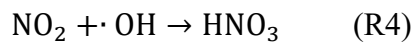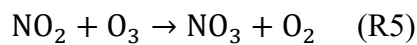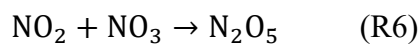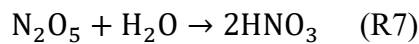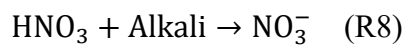

### **Text S3 The estimation of δ<sup>15</sup>N-NH<sub>4</sub><sup>+</sup> from sugarcane leaf burning**

The δ<sup>15</sup>N in sugarcane leaf is 38‰ (Martinellia et al., 2002), which may consist of N-NO<sub>x</sub> and N-NH<sub>3</sub>. The δ<sup>15</sup>N-NO<sub>x</sub> from biomass burning is 1.04‰ (Zong et al., 2017). According to the assumption of different proportions (from 5% to 95%) of N-NO<sub>x</sub> and N-NH<sub>3</sub> from sugarcane leaf, shown in **Table S2**. The mean value among the proportion (from 5% to 95%) of N-NH<sub>4</sub><sup>+</sup> in sugarcane leaf was 37.48‰. In addition, the δ<sup>15</sup>N of

particulate matters from biomass burning was 6.6‰ higher than that of biomass (Martinellia et al., 2002). Therefore,  $\delta^{15}\text{N-NH}_4^+$  from sugarcane leaf burning may be 44.08‰.

**Figure S1-Figure S6**

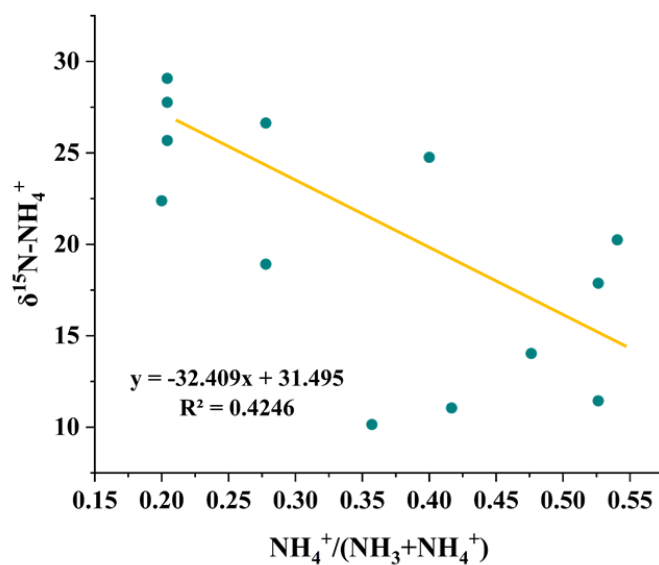

**Figure S1.** Linear fitting of  $\text{NH}_4^+(\text{NH}_3+\text{NH}_4^+)$  with  $\delta^{15}\text{N-NH}_4^+$ .

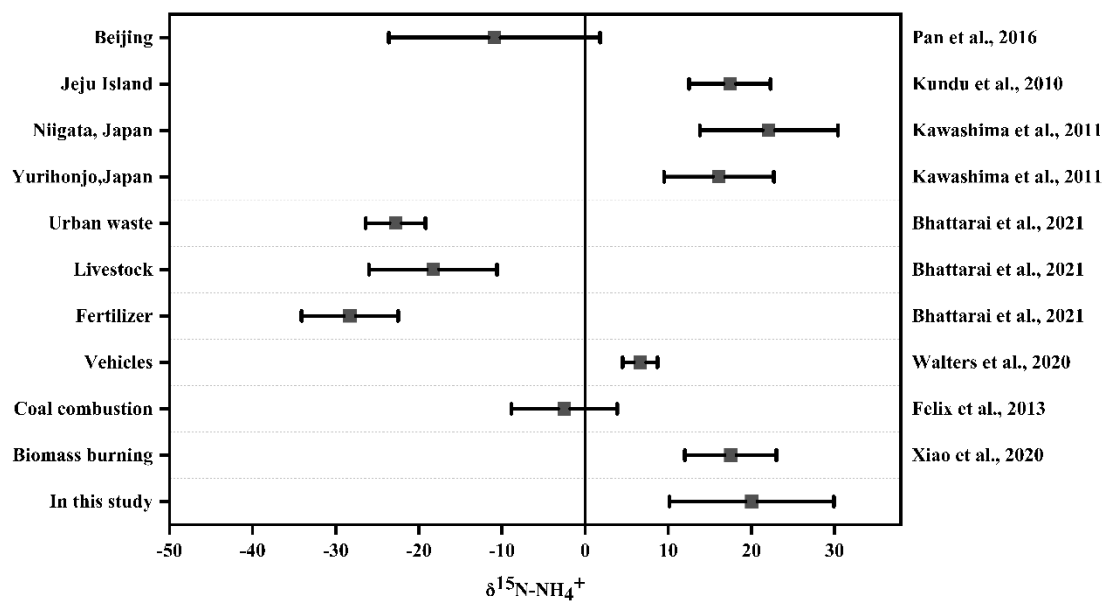

**Figure S2.** Ranges of  $\delta^{15}\text{N-NH}_4^+$  from different sites (Pan et al., 2016; Kundu et al., 2010; Kawashima and Kurahashi, 2011) and different emission sources (Felix et al., 2013; Bhattarai et al., 2021; Chang et al., 2016; Xiao et al., 2020).



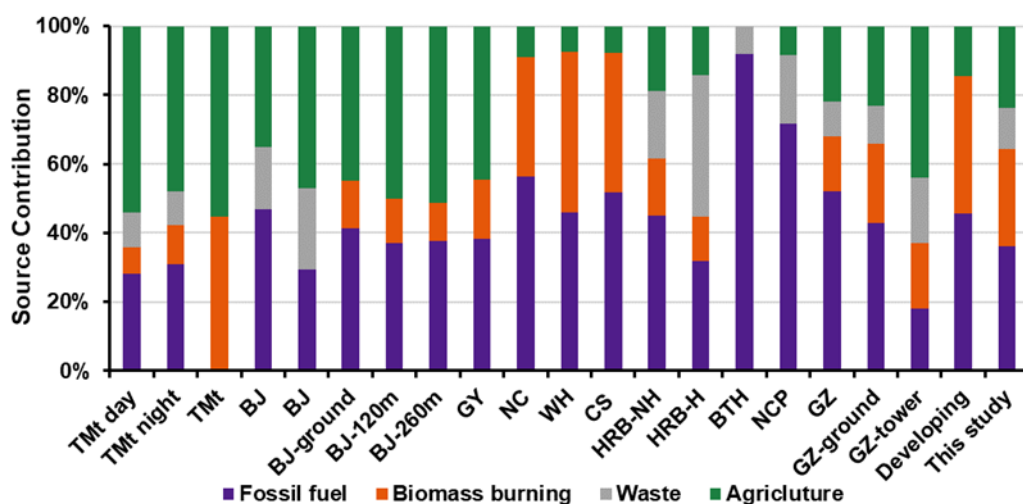

**Figure S3.** The comparison of sources apportionment results of atmospheric  $\text{NH}_3$  and  $\text{NH}_4^+$  in different sites in China. Background site in Tai mountain[TMT] (Wu et al., 2021; Chang et al., 2019), urban sites in North China (Beijing [BJ] (Pan et al., 2020; Chang et al., 2016), vertical profile observation in Beijing (ground, 120m height, and 260m height [BJ-ground, BJ-120m, and BJ-260m] (Wu et al., 2019), Jingjinji region [BTH] (Zhang et al., 2020), and North China plain [NCP]) (Xiang et al., 2022), East North China (Harbin heating period and non-heating period [HRB-H and HRB-NH]) (Sun et al., 2021), Central China (Wuhan [WH] and Changsha [CS]) (Xiao et al., 2020), East China (Nangchang [NC]) (Xiao et al., 2020), Southwest China (Guiyang [GY], source in precipitation) (Liu et al., 2017b), and South China (Guangzhou[GZ]) (Liu et al., 2018), vertical profile observation in Guangzhou( ground and Guangzhou tower [GZ-ground and GZ-tower])(Chen et al., 2022a). Source of  $\text{NH}_3$  were estimated by inventory methods in developing country[developing] (Meng et al., 2017).

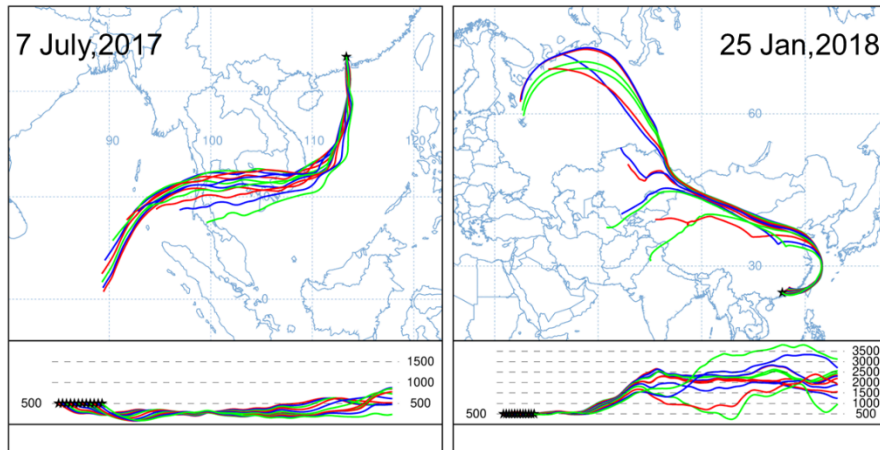

**Figure S4.** The air mass backward trajectory to receptor site on 7 July,2017 and 25 Jan,2018.

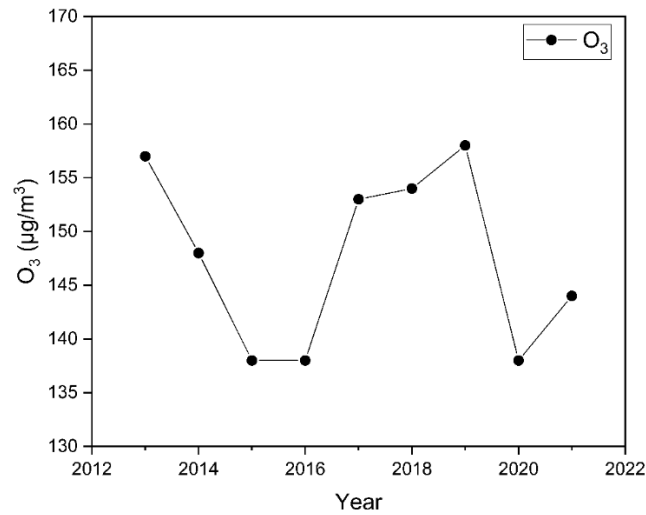

**Figure S5.** The temporal variation of O<sub>3</sub> concentration in PRD from 2013 to 2021.

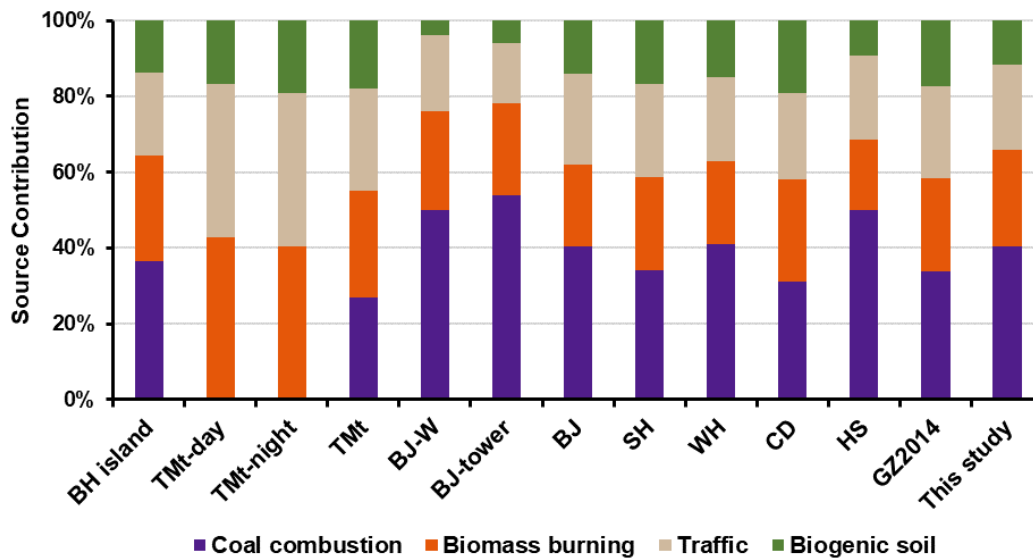

**Figure S6.** The comparison of sources apportionment results of atmospheric NO<sub>x</sub> and NO<sub>3</sub><sup>-</sup> in different sites in China. Background in Beihuangcheng island [BH island](Zong et al., 2017) and Tai mountain [TMT] (Wu et al., 2021), urban sites in North China (Beijing [BJ] (Zong et al., 2020), Beijing winter [BJ-W] (Fan et al., 2020), and vertical profile observation in Beijing [BJ-tower](Fan et al., 2022)), Central China (Wuhan [WH]) (Zong et al., 2020), East China (Shanghai [SH]) (Zong et al., 2020), Southwest China (Chengdu [CD]), and South China (Guangzhou [GZ2014] and Heshan [HS])(Zong et al., 2020; Su et al., 2020).

## Table S1-Table S2

**Table S1.** Test constants of A, B, C, and D over the settled temperature range of 150–450K(Zong et al., 2017; Walters and Michalski, 2016; Walters et al., 2016; Walters and Michalski, 2015).

| ${}^m\alpha_{X/Y}$                        | A        | B       | C       | D        |
|-------------------------------------------|----------|---------|---------|----------|
| ${}^{15}\text{NO}_2/\text{NO}$            | 3.8834   | -7.7299 | 6.0101  | -0.17928 |
| ${}^{15}\text{N}_2\text{O}_5/\text{NO}_2$ | 0.69398  | -1.9859 | 2.3876  | 0.16308  |
| ${}^{18}\text{NO}/\text{NO}_2$            | -0.04129 | 1.1605  | -1.8829 | 0.74723  |
| ${}^{18}\text{H}_2\text{O}/\text{OH}$     | 2.1137   | -3.8026 | 2.5653  | 0.59410  |

**Table S2.** The estimation of  $\delta^{15}\text{N-NH}_3$  in sugarcane leaf.

| N-NOx in sugarcane leaf (%)                       | 5     | 25    | 50    | 75    | 95    |
|---------------------------------------------------|-------|-------|-------|-------|-------|
| $\delta^{15}\text{N}$ in sugarcane leaf (‰)       | 38    | 38    | 38    | 38    | 38    |
| $\delta^{15}\text{N-NOx}$ (‰)                     | 1.04  | 1.04  | 1.04  | 1.04  | 1.04  |
| Calculated results $\delta^{15}\text{N-NH}_3$ (‰) | 37.95 | 37.74 | 37.48 | 37.22 | 37.01 |

## References:

- Andreae, M. O. and Crutzen, P. J.: Atmospheric aerosols: biogeochemical sources and role in atmospheric chemistry, *Science*, 276, 1052-1058, <https://doi.org/10.1126/science.276.5315.1052>, 1997.
- Bhattacharai, N., Wang, S., Pan, Y., Xu, Q., Zhang, Y., Chang, Y., and Fang, Y.:  $\delta^{15}\text{N}$ -stable isotope analysis of  $\text{NH}_x$ : An overview on analytical measurements, source sampling and its source apportionment, *Front. Environ. Sci. Eng.*, 15, 126, <https://doi.org/10.1007/s11783-021-1414-6>, 2021.
- Chang, Y., Deng, C., Dore, A. J., and Zhuang, G.: Human Excreta as a Stable and Important Source of Atmospheric Ammonia in the Megacity of Shanghai, *PLoS One*, 10, e0144661, <https://doi.org/10.1371/journal.pone.0144661>, 2015.
- Chang, Y., Liu, X., Deng, C., Dore, A. J., and Zhuang, G.: Source apportionment of atmospheric ammonia before, during, and after the 2014 APEC summit in Beijing using stable nitrogen isotope signatures, *Atmos. Chem. Phys.*, 16, 11635-11647, <https://doi.org/10.5194/acp-16-11635-2016>, 2016.
- Chang, Y., Zhang, Y.-L., Li, J., Tian, C., Song, L., Zhai, X., Zhang, W., Huang, T., Lin, Y.-C., Zhu, C., Fang, Y., Lehmann, M. F., and Chen, J.: Isotopic constraints on the atmospheric sources and formation of nitrogenous species in clouds influenced by biomass burning, *Atmos. Chem. Phys.*, 19, 12221–12234, <https://doi.org/10.5194/acp-19-12221-2019>, 2019.
- Chen, Z., Pei, C., Liu, J., Zhang, X., Ding, P., Dang, L., Zong, Z., Jiang, F., Wu, L., Sun, X., Zhou, S., Zhang, Y., Zhang, Z., Zheng, J., Tian, C., Li, J., and Zhang, G.: Non-agricultural source dominates the ammonium aerosol in the largest city of South China based on the vertical  $\delta^{15}\text{N}$  measurements,

- Sci. Total Environ., 848, 157750, <https://doi.org/10.1016/j.scitotenv.2022.157750>, 2022a.
- Chen, Z. L., Song, W., Hu, C. C., Liu, X. J., Chen, G. Y., Walters, W. W., Michalski, G., Liu, C. Q., Fowler, D., and Liu, X. Y.: Significant contributions of combustion-related sources to ammonia emissions, *Nat. Commun.*, 13, 7710, <https://doi.org/10.1038/s41467-022-35381-4>, 2022b.
- Elliott, E. M., Kendall, C., Wankel, S. D., Burns, D. A., Boyer, E. W., Harlin, K., Bain, D. J., and Butler, T. J.: Nitrogen isotopes as indicators of NO<sub>x</sub> source contributions to atmospheric nitrate deposition across the midwestern and Northeastern United States, *Environ. Sci. Technol.*, 41, 7661-7667, <https://doi.org/10.1021/es070898t>, 2007.
- Fan, M.-Y., Zhang, Y.-L., Hong, Y., Lin, Y.-C., Zhao, Z.-Y., Cao, F., Sun, Y., Guo, H., and Fu, P.: Vertical differences of nitrate sources in urban boundary layer based on tower measurements, *Environ. Sci. Technol. Lett.*, 2c00600, <https://doi.org/10.1021/acs.estlett.2c00600>, 2022.
- Fan, M. Y., Zhang, Y. L., Lin, Y. C., Cao, F., Zhao, Z. Y., Sun, Y., Qiu, Y., Fu, P., and Wang, Y.: Changes of emission sources to nitrate aerosols in Beijing after the clean air actions: evidence from dual isotope compositions, *J. Geophys. Res.: Atmos.*, 125, 031998, <https://doi.org/10.1029/2019jd031998>, 2020.
- Fang, Y. T., Koba, K., Wang, X. M., Wen, D. Z., Li, J., Takebayashi, Y., Liu, X. Y., and Yoh, M.: Anthropogenic imprints on nitrogen and oxygen isotopic composition of precipitation nitrate in a nitrogen-polluted city in southern China, *Atmos. Chem. Phys.*, 11, 1313-1325, <https://doi.org/10.5194/acp-11-1313-2011>, 2011.
- Felix, J. D., Elliott, E. M., Gish, T. J., McConnell, L. L., and Shaw, S. L.: Characterizing the isotopic composition of atmospheric ammonia emission sources using passive samplers and a combined oxidation-bacterial denitrifier approach, *Rapid Commun. Mass Spectrom.*, 27, 2239-2246, <https://doi.org/10.1002/rcm.6679>, 2013.
- Hall, S. J. and Matson, P. A.: NO<sub>x</sub> emissions from soil: implications for air quality modeling in agricultural regions, *Annu. Rev. Energy Environ.*, 21, 311-346, <https://doi.org/10.1146/annurev.energy.21.1.311>, 1996.
- Hastings, M. G., Sigman, D. M., and Lipschultz, F.: Isotopic evidence for source changes of nitrate in rain at Bermuda, *J. Geophys. Res.: Atmos.*, 108, 1-12, <https://doi.org/10.1029/2003jd003789>, 2003.
- Jaeglé, L., Martin, R. V., Chance, K., Steinberger, L., Kurosu, T. P., Jacob, D. J., Modi, A. I., Yoboué, V., Sigha-Nkamdjou, L., and Galy-Lacaux, C.: Satellite mapping of rain-induced nitric oxide emissions from soils, *J. Geophys. Res.: Atmos.*, 109, D21310, <https://doi.org/10.1029/2004jd004787>, 2004.
- Jiang, H., Li, J., Sun, R., Liu, G., Tian, C., Tang, J., Cheng, Z., Zhu, S., Zhong, G., Ding, X., and Zhang, G.: Determining the sources and transport of brown carbon using radionuclide tracers and modeling, *J. Geophys. Res.: Atmos.*, 126, e2021JD034616, <https://doi.org/10.1029/2021jd034616>, 2021.
- Kawashima, H. and Kurahashi, T.: Inorganic ion and nitrogen isotopic compositions of atmospheric aerosols at Yurihonjo, Japan: implications for nitrogen sources, *Atmos. Environ.*, 45, 6309-6316, <https://doi.org/10.1016/j.atmosenv.2011.08.057>, 2011.
- Kundu, S., Kawamura, K., and Lee, M.: Seasonal variation of the concentrations of nitrogenous species and their nitrogen isotopic ratios in aerosols at Gosan, Jeju Island: Implications for atmospheric processing and source changes of aerosols, *J. Geophys. Res.*, 115, <https://doi.org/10.1029/2009jd013323>, 2010.
- Liu, F., Beirle, S., Zhang, Q., van der A. R., Zheng, B., Tong, D., and He, K.: NO<sub>x</sub> emission trends over Chinese cities estimated from OMI observations during 2005 to 2015, *Atmos. Chem. Phys.*, 17, 9261-9275, <https://doi.org/10.5194/acp-17-9261-2017>, 2017a.

- Liu, G., Wu, J., Li, Y., Su, L., and Ding, M.: Temporal variations of  $^7\text{Be}$  and  $^{210}\text{Pb}$  activity concentrations in the atmosphere and aerosol deposition velocity in Shenzhen, South China, *Aerosol Air Qual. Res.*, 20, 1607–1617, <https://doi.org/10.4209/aaqr.2019.11.0560>, 2020.
- Liu, J., Ding, P., Zong, Z., Li, J., Tian, C., Chen, W., Chang, M., Salazar, G., Shen, C., Cheng, Z., Chen, Y., Wang, X., Szidat, S., and Zhang, G.: Evidence of rural and suburban sources of urban haze formation in China: a case study from the Pearl River Delta region, *J. Geophys. Res.: Atmos.*, 123, 4712–4726, <https://doi.org/10.1029/2017jd027952>, 2018.
- Liu, T., Wang, X., Wang, B., Ding, X., Deng, W., Lü, S., and Zhang, Y.: Emission factor of ammonia ( $\text{NH}_3$ ) from on-road vehicles in China: tunnel tests in urban Guangzhou, *Environ. Res. Lett.*, 9, 064027, <https://doi.org/10.1088/1748-9326/9/6/064027>, 2014.
- Liu, X. Y., Xiao, H. W., Xiao, H. Y., Song, W., Sun, X. C., Zheng, X. D., Liu, C. Q., and Koba, K.: Stable isotope analyses of precipitation nitrogen sources in Guiyang, southwestern China, *Environ. Pollut.*, 230, 486–494, <https://doi.org/10.1016/j.envpol.2017.06.010>, 2017b.
- Martinellia, L. A., Camargoa, P. B., Laraa, L. B. L. S., Victoriaa, R. L., and Artaxo, P.: Stable carbon and nitrogen isotopic composition of bulk aerosol particles in a C4 plant landscape of southeast Brazil, *Atmos. Environ.*, 36, 2427–2432, [https://doi.org/10.1016/S1352-2310\(01\)00454-X](https://doi.org/10.1016/S1352-2310(01)00454-X), 2002.
- Mehmood, K., Chang, S., Yu, S., Wang, L., Li, P., Li, Z., Liu, W., Rosenfeld, D., and Seinfeld, J. H.: Spatial and temporal distributions of air pollutant emissions from open crop straw and biomass burnings in China from 2002 to 2016, *Environ. Chem. Lett.*, 16, 301–309, <https://doi.org/10.1007/s10311-017-0675-6>, 2017.
- Meng, W., Zhong, Q., Yun, X., Zhu, X., Huang, T., Shen, H., Chen, Y., Chen, H., Zhou, F., Liu, J., Wang, X., Zeng, E. Y., and Tao, S.: Improvement of a global high-resolution ammonia emission inventory for combustion and industrial sources with new data from the residential and transportation sectors, *Environ. Sci. Technol.*, 51, 2821–2829, <https://doi.org/10.1021/acs.est.6b03694>, 2017.
- Pan, Y., Tian, S., Liu, D., Fang, Y., Zhu, X., Zhang, Q., Zheng, B., Michalski, G., and Wang, Y.: Fossil fuel combustion-related emissions dominate atmospheric ammonia sources during severe haze episodes: evidence from  $^{15}\text{N}$ -stable isotope in size-resolved aerosol ammonium, *Environ. Sci. Technol.*, 50, 8049–8056, <https://doi.org/10.1021/acs.est.6b00634>, 2016.
- Pan, Y., Tian, S., Liu, D., Fang, Y., Zhu, X., Gao, M., Wentworth, G. R., Michalski, G., Huang, X., and Wang, Y.: Source Apportionment of Aerosol Ammonium in an Ammonia-Rich Atmosphere: An Isotopic Study of Summer Clean and Hazy Days in Urban Beijing, *J. Geophys. Res.: Atmos.*, 123, 5681–5689, <https://doi.org/10.1029/2017jd028095>, 2018.
- Pan, Y., Gu, M., He, Y., Wu, D., Liu, C., Song, L., Tian, S., Lü, X., Sun, Y., Song, T., Walters, W. W., Liu, X., Martin, N. A., Zhang, Q., Fang, Y., Ferracci, V., and Wang, Y.: Revisiting the concentration observations and source apportionment of atmospheric ammonia, *Adv. Atmos. Sci.*, 37, 933–938, <https://doi.org/10.1007/s00376-020-2111-2>, 2020.
- Pickering, K. E., Bucsela, E., Allen, D., Ring, A., Holzworth, R., and Krotkov, N.: Estimates of lightning NO<sub>x</sub> production based on OMI NO<sub>2</sub> observations over the Gulf of Mexico, *J. Geophys. Res.: Atmos.*, 121, 8668–8691, <https://doi.org/10.1002/2015jd024179>, 2016.
- Qu, K., Wang, X., Xiao, T., Shen, J., Lin, T., Chen, D., He, L. Y., Huang, X. F., Zeng, L., Lu, K., Ou, Y., and Zhang, Y.: Cross-regional transport of PM<sub>2.5</sub> nitrate in the Pearl River Delta, China: Contributions and mechanisms, *Sci. Total Environ.*, 753, 142439, <https://doi.org/10.1016/j.scitotenv.2020.142439>, 2021.
- Qu, Z., Henze, D. K., Cooper, O. R., and Neu, J. L.: Impacts of global NO<sub>x</sub> inversions on NO<sub>2</sub> and ozone

- simulations, *Atmos. Chem. Phys.*, 20, 13109-13130, <https://doi.org/10.5194/acp-20-13109-2020>, 2020.
- Song, W., Liu, X. Y., and Liu, C. Q.: New Constraints on Isotopic Effects and Major Sources of Nitrate in Atmospheric Particulates by Combining  $\delta^{15}\text{N}$  and  $\Delta^{17}\text{O}$  Signatures, *J. Geophys. Res.: Atmos.*, 126, <https://doi.org/10.1029/2020jd034168>, 2021.
- Su, T., Li, J., Tian, C., Zong, Z., Chen, D., and Zhang, G.: Source and formation of fine particulate nitrate in South China: Constrained by isotopic modeling and online trace gas analysis, *Atmos. Environ.*, 231, <https://doi.org/10.1016/j.atmosenv.2020.117563>, 2020.
- Sun, J., Qin, M., Xie, X., Fu, W., Qin, Y., Sheng, L., Li, L., Li, J., Sulaymon, I. D., Jiang, L., Huang, L., Yu, X., and Hu, J.: Seasonal modeling analysis of nitrate formation pathways in Yangtze River Delta region, China, *Atmos. Chem. Phys.*, 22, 12629-12646, <https://doi.org/10.5194/acp-22-12629-2022>, 2022.
- Sun, X., Zong, Z., Li, Q., Shi, X., Wang, K., Lu, L., Li, B., Qi, H., and Tian, C.: Assessing the emission sources and reduction potential of atmospheric ammonia at an urban site in Northeast China, *Environ. Res.*, 198, 111230, <https://doi.org/10.1016/j.envres.2021.111230>, 2021.
- Tan, Z., Lu, K., Jiang, M., Su, R., Wang, H., Lou, S., Fu, Q., Zhai, C., Tan, Q., Yue, D., Chen, D., Wang, Z., Xie, S., Zeng, L., and Zhang, Y.: Daytime atmospheric oxidation capacity in four Chinese megacities during the photochemically polluted season: a case study based on box model simulation, *Atmos. Chem. Phys.*, 19, 3493–3513, <https://doi.org/10.5194/acp-19-3493-2019>, 2019.
- Walters, W. W. and Michalski, G.: Theoretical calculation of nitrogen isotope equilibrium exchange fractionation factors for various  $\text{NO}_y$  molecules, *Geochim. Cosmochim. Ac.*, 164, 284-297, <https://doi.org/10.1016/j.gca.2015.05.029>, 2015.
- Walters, W. W. and Michalski, G.: Theoretical calculation of oxygen equilibrium isotope fractionation factors involving various  $\text{NO}_y$  molecules, OH, and  $\text{H}_2\text{O}$  and its implications for isotope variations in atmospheric nitrate, *Geochim. Cosmochim. Ac.*, 191, 89–101 <https://doi.org/10.1016/j.gca.2016.06.039>, 2016.
- Walters, W. W., Simonini, D. S., and Michalski, G.: Nitrogen isotope exchange between NO and  $\text{NO}_2$  and its implications for  $\delta^{15}\text{N}$  variations in tropospheric  $\text{NO}_x$  and atmospheric nitrate, *Geophys. Res. Lett.*, 43, 440-448, <https://doi.org/10.1002/2015gl066438>, 2016.
- Wu, L., Yue, S., Shi, Z., Hu, W., Chen, J., Ren, H., Deng, J., Ren, L., Fang, Y., Li, W., Harrison, R. M., and Fu, P.: Source forensics of inorganic and organic nitrogen using  $\delta^{15}\text{N}$  for tropospheric aerosols over Mt. Tai, *npj Clim. Atmos. Sci.*, 8, <https://doi.org/10.1038/s41612-021-00163-0>, 2021.
- Wu, L., Ren, H., Wang, P., Chen, J., Fang, Y., Hu, W., Ren, L., Deng, J., Song, Y., Li, J., Sun, Y., Wang, Z., Liu, C.-Q., Ying, Q., and Fu, P.: Aerosol ammonium in the urban boundary layer in Beijing: insights from nitrogen isotope ratios and simulations in summer 2015, *Environ. Sci. Technol. Lett.*, 6, 389-395, <https://doi.org/10.1021/acs.estlett.9b00328>, 2019.
- Xiang, Y.-K., Dao, X., Gao, M., Lin, Y.-C., Cao, F., Yang, X.-Y., and Zhang, Y.-L.: Nitrogen isotope characteristics and source apportionment of atmospheric ammonium in urban cities during a haze event in Northern China Plain, *Atmos. Environ.*, 269, 118800, <https://doi.org/10.1016/j.atmosenv.2021.118800>, 2022.
- Xiao, H.-W., Xie, L.-H., Long, A.-M., Ye, F., Pan, Y.-P., Li, D.-N., Long, Z.-H., Chen, L., Xiao, H.-Y., and Liu, C.-Q.: Use of isotopic compositions of nitrate in TSP to identify sources and chemistry in South China Sea, *Atmos. Environ.*, 109, 70-78, <https://doi.org/10.1016/j.atmosenv.2015.03.006>, 2015.

- Xiao, H. W., Wu, J. F., Luo, L., Liu, C., Xie, Y. J., and Xiao, H. Y.: Enhanced biomass burning as a source of aerosol ammonium over cities in central China in autumn, *Environ. Pollut.*, 266, 115278, <https://doi.org/10.1016/j.envpol.2020.115278>, 2020.
- Yin, F., Grosjean, D., and Seinfeld, J. H.: Photooxidation of Dimethyl Sulfide and Dimethyl Disulfide. I: Mechanism Development, *J. Atmos. Chem.*, 11, 309-364, 1990.
- Zhang, Z., Zeng, Y., Zheng, N., Luo, L., Xiao, H., and Xiao, H.: Fossil fuel-related emissions were the major source of NH<sub>3</sub> pollution in urban cities of northern China in the autumn of 2017, *Environ. Pollut.*, 256, 113428, <https://doi.org/10.1016/j.envpol.2019.113428>, 2020.
- Zheng, J. Y., Yin, S. S., Kang, D. W., Che, W. W., and Zhong, L. J.: Development and uncertainty analysis of a high-resolution NH<sub>3</sub> emissions inventory and its implications with precipitation over the Pearl River Delta region, China, *Atmos. Chem. Phys.*, 12, 7041-7058, <https://doi.org/10.5194/acp-12-7041-2012>, 2012.
- Zong, Z., Tan, Y., Wang, X., Tian, C., Li, J., Fang, Y., Chen, Y., Cui, S., and Zhang, G.: Dual-modelling-based source apportionment of NO<sub>x</sub> in five Chinese megacities: providing the isotopic footprint from 2013 to 2014, *Environ. Int.*, 137, 105592, <https://doi.org/10.1016/j.envint.2020.105592>, 2020.
- Zong, Z., Wang, X., Tian, C., Chen, Y., Fang, Y., Zhang, F., Li, C., Sun, J., Li, J., and Zhang, G.: First assessment of NO<sub>x</sub> sources at a regional background site in North China using isotopic analysis linked with modeling, *Environ. Sci. Technol.*, 51, 5923-5931, <https://doi.org/10.1021/acs.est.6b06316>, 2017.
